# Supplementary material
Source: publisher figshare collection journal article supplement (https://acs.figshare.com/ndownloader/files/27913564)
Supplement: Supplementary file 1 [file 27913564]

## **Supporting Information**

### **Different design strategies of metal sulfide sorbents to capture low concentrations of gaseous Hg<sup>0</sup> in coal-fired flue gas and high concentrations of gaseous Hg<sup>0</sup> in smelting flue gas**

Chang Wang, Jian Mei, Qianqian Hong, Fangtian Xie, Zhen Ding, Chen Ma, Shijian Yang\*

*School of Environment and Civil Engineering, Jiangnan University, Wuxi, 214122, P. R. China*

Corresponding Author:

\* School of Environment and Civil Engineering, Jiangnan University. Telephone: 86-18-066068302;

E-mail: yangshijiangsq@163.com.

Content including: five pages, one table and three figures.

**Table S1** The amounts of Hg<sup>0</sup> captured by sulfureted Mo/FeTiO<sub>x</sub>/mg g<sup>-1</sup>

| Hg <sup>0</sup> concentration |                                              | 40 °C | 60 °C | 80 °C |
|-------------------------------|----------------------------------------------|-------|-------|-------|
| 4300 µg m <sup>-3</sup>       | without H <sub>2</sub> O and SO <sub>2</sub> | 15.7  | 16.8  | 16.0  |
|                               | with H <sub>2</sub> O and SO <sub>2</sub>    | 14.9  | 15.6  | 14.2  |
| 110 µg m <sup>-3</sup>        | without H <sub>2</sub> O and SO <sub>2</sub> | 5.25  | 5.96  | 4.31  |
|                               | with H <sub>2</sub> O and SO <sub>2</sub>    | 4.68  | 5.52  | 4.05  |

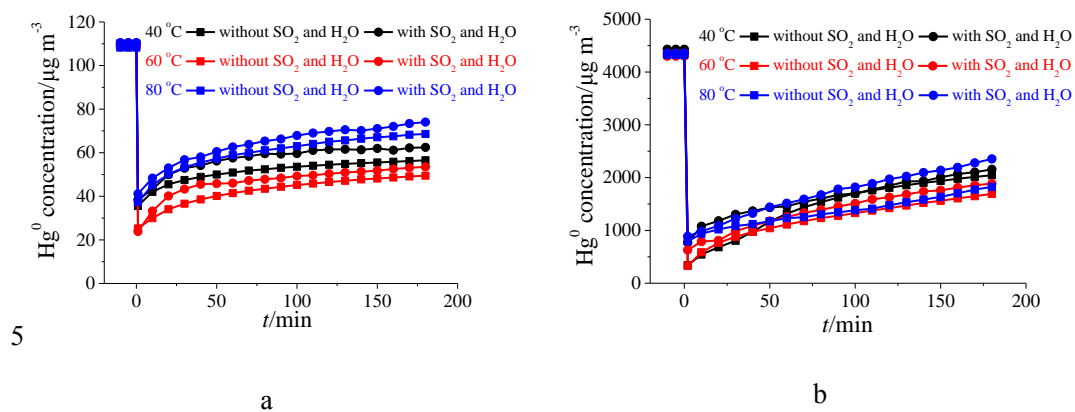

**Figure S1** (a), Effect of H<sub>2</sub>O and SO<sub>2</sub> on the adsorption of low concentrations of gaseous Hg<sup>0</sup> onto sulfured Mo/FeTiO<sub>x</sub>. Reaction conditions: sorbent mass = 5 mg, total flow rate = 500 mL min<sup>-1</sup>, MHSV = 6,000,000 cm<sup>3</sup> g<sup>-1</sup> h<sup>-1</sup>, [O<sub>2</sub>] = 5% (when used), [H<sub>2</sub>O] = 8% (when used), and [SO<sub>2</sub>] = 80 ppm (when used);

(b), Effect of H<sub>2</sub>O and SO<sub>2</sub> on the adsorption of high concentrations of gaseous Hg<sup>0</sup> onto sulfured Mo/FeTiO<sub>x</sub>. Reaction conditions: [Hg<sup>0</sup>] = 4300 µg m<sup>-3</sup>, sorbent mass = 10 mg, total flow rate = 300 mL min<sup>-1</sup>, MHSV = 1,800,000 cm<sup>3</sup> g<sup>-1</sup> h<sup>-1</sup>, [O<sub>2</sub>] = 7% (when used), [H<sub>2</sub>O] = 8% (when used), and [SO<sub>2</sub>] = 1% (when used).

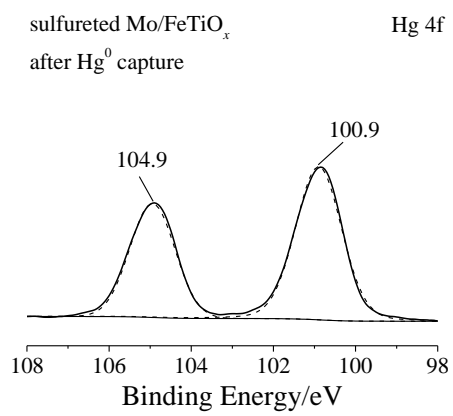

**Figure S2** XPS spectra for sulfured Mo/FeTiO<sub>x</sub> after Hg<sup>0</sup> capture in Hg 4f spectral region

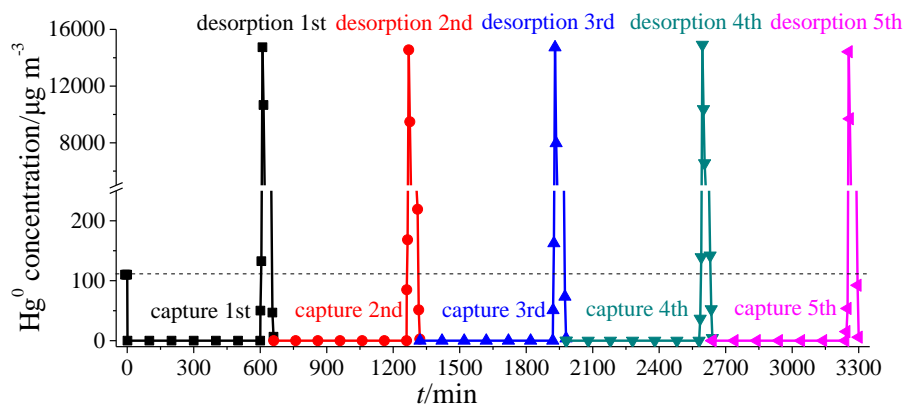

a

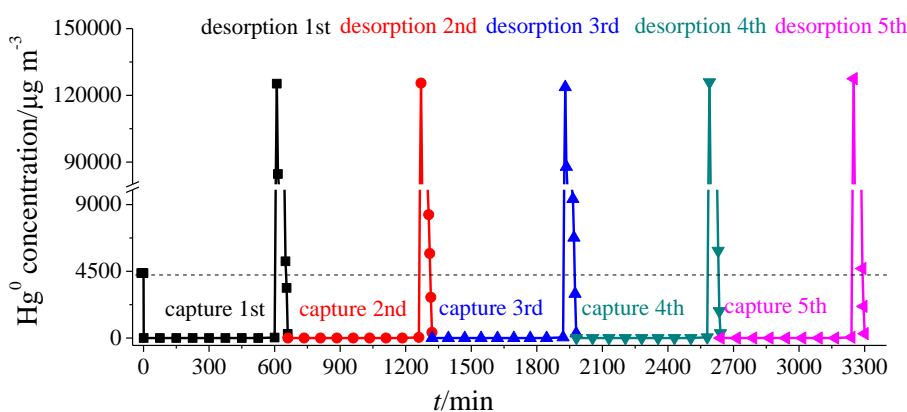

b

**Figure S3** (a), Five cycles of the enrichment of gaseous  $\text{Hg}^0$  in CFG using reproducible sulfured  $\text{Mo/FeTiO}_x$ . Operating conditions of  $\text{Hg}^0$  capture: adsorption temperature = 60 °C,  $[\text{Hg}^0] = 110 \mu\text{g m}^{-3}$ ,  $[\text{O}_2] = 5\%$ ,  $[\text{H}_2\text{O}] = 8\%$ ,  $[\text{SO}_2] = 80 \text{ ppm}$ , sorbent mass = 50 mg, total flow rate = 500 mL  $\text{min}^{-1}$ , and  $\text{MHSV} = 6.0 \times 10^5 \text{ cm}^3 \text{ g}^{-1} \text{ h}^{-1}$ ; Operating conditions of  $\text{Hg}^0$  desorption: desorption temperature = 400 °C, total flow rate of air = 100 mL  $\text{min}^{-1}$ , and  $\text{MHSV} = 1.2 \times 10^5 \text{ cm}^3 \text{ g}^{-1} \text{ h}^{-1}$ .

(b), Five cycles of the enrichment of gaseous  $\text{Hg}^0$  in SFG using reproducible sulfured  $\text{Mo/FeTiO}_x$ . Operating conditions of  $\text{Hg}^0$  capture: adsorption temperature = 60 °C,  $[\text{Hg}^0] = 4300 \mu\text{g m}^{-3}$ ,  $[\text{O}_2] = 7\%$ ,  $[\text{H}_2\text{O}] = 8\%$ ,  $[\text{SO}_2] = 1\%$ , sorbent mass = 150 mg, total flow rate = 300 mL  $\text{min}^{-1}$ , and  $\text{MHSV} = 1.2 \times 10^5 \text{ cm}^3 \text{ g}^{-1} \text{ h}^{-1}$ . Operating conditions of  $\text{Hg}^0$  desorption: desorption temperature = 400 °C and total flow rate of air = 100 mL  $\text{min}^{-1}$ , and  $\text{MHSV} = 4.0 \times 10^4 \text{ cm}^3 \text{ g}^{-1} \text{ h}^{-1}$ .
